# Supplementary material for: Technical note: Accelerate coccolith size separation via repeated centrifugation
Source: Copernicus journal article supplement (doi:10.5194/bg-18-1909-2021), 2021-03-18
Supplement: Supplementary file 2 [file bg-18-1909-2021-supplement.zip]

Archive with 8 entries (7 files):
- bg-18-1909-2021-supplement-title-page.pdf
- Supplements/
- Supplements/Configuration.txt
- Supplements/Separated coccoliths in microscope.pdf
- Supplements/CM.m
- Supplements/Read me.docx
- Supplements/acc.txt
- Supplements/dec.txt
