# Supplementary material for: Technical note: Accelerate coccolith size separation via repeated centrifugation
Source: Copernicus journal article supplement (doi:10.5194/bg-18-1909-2021), 2021-03-18
Supplement: Supplementary file 2 [file bg-18-1909-2021-supplement.zip › bg-18-1909-2021-supplement-title-page.pdf]

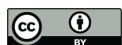

## *Supplement of*

# **Technical note: Accelerate coccolith size separation via repeated centrifugation**

**Hongrui Zhang et al.**

*Correspondence to:* Hongrui Zhang (zhh@ethz.ch, zhang\_hongrui@alumni.tongji.edu.cn)

- bg-18-1909-2021-supplement-title-page.pdf
- Supplements
  - CM.m
  - Configuration.txt
  - Read me.docx
  - Separated coccoliths in microscope.pdf
  - acc.txt
  - dec.txt

The copyright of individual parts of the supplement might differ from the article licence.
