# Supplementary material for: Technical note: Accelerate coccolith size separation via repeated centrifugation
Source: Copernicus journal article supplement (doi:10.5194/bg-18-1909-2021), 2021-03-18
Supplement: Supplementary file 2 [file bg-18-1909-2021-supplement.zip › Supplements/Configuration.txt]

Ty      Cubic
L       0.11
D       0.056
S       0.6
T       60
Wmin    500
Wmax    4000
Step    250
