# Supplementary material for: Technical note: Accelerate coccolith size separation via repeated centrifugation
Source: Copernicus journal article supplement (doi:10.5194/bg-18-1909-2021), 2021-03-18
Supplement: Supplementary file 2 [file bg-18-1909-2021-supplement.zip › Supplements/Read me.docx]

The matlab code ‘CM.m’ was designed to estimate the best centrifugation duration for coccolith separation in different size. The main program was written in ‘CM.m’ and before running it, the other three txt files should be with ‘CM.m’ in the same folder.

**Step 1:** Input the angular velocity of centrifuge during the acceleration and deceleration stages to ‘***acc.txt***’ and ‘***dec.txt***’.

The left column is time with a unit of second and the right one is angular velocity with a unit of RPM. For example:

0 0

5 200

7 300

10 500

10 600

11 700

13 1000

19 1500

This ω-t relationship can be measured by reading the numbers on panel if it is not available on the instruction. More data here could increase the calculation accuracy.

**Step 2:** Check the centrifugation setting in the ‘***Configuration.txt***’.

***Ty*** represents the type of acceleration/deceleration curve: ***Cubic*** or ***Liner***

***L*** represents the minimum rotation radius, which should be measured for a certain type of centrifuge.

***D*** represents the maximum sinking distance of coccolith, which represents the suspension column height from 15 mL to 45 mL;

***S*** represents the coccolith sinking velocity under gravity with a unit of cm/h. Notice the sinking velocity vary with temperature.

***T*** is the duration of centrifugation with a unit of second.

***Wmin*** and ***Wmax*** represent the minimum and maximum ω and the ***Step*** represent ω increases with a certain length of step.

For example, if we input

Wmin 100

Wmax 200

Step 25

we will have a series of ω as following:

100 125 150 175 200 RPM

We input this series of ω into Eq. 1 to solve duration (t3-t2), after that find out which ω leads to the duration closest to the input duration (***T***).

The time coast of calculation with the increase of ω range (***Wmax*** - ***Wmin***) and decrease of ***Step***.

**Step 3:** Type ***result = CM(‘Configuration.txt’);*** in the matlab command window. The best fitted centrifugation duration will be sorted in the parameter named as ‘result’ with a unit of second.
